# Supplementary material
Source: Research Square preprint supplement (doi:10.21203/rs.3.rs-8962152/v1)
Supplement: Supplementary file 1 [file 0aea06eeb109bdf996bc7b07.xlsx]

## Sheet: supple table1
Supplementary Table 1. Primers used in this study
Name	Sequence
Cloning
SGN3(CDS)_F_BamHI	GCTAGGATCCATGCAACCACTAGTTCTTCTC
SGN3(CDS)_R_SalI	TAGCGTCGACCAGCTTCTTATAACCGGCC
SGN3(KD)_F_BamHI	GCTAGGATCCCTAAGCGAGGAGTTCATGATTG
SGN3(KD)_R_SalI	TAGCGTCGACTCAGTTGTAGACATGGAGAAGACTATC
SGN3(K979E)_F	GAGACTGTTGCAGTGGAAAAGATTCTCTGGA
SGN3(K979E)_R	TCCAGAGAATCTTTTCCACTGCAACAGTCTC
SGN1(CDS)_F_KpnI	GCTAGGTACCGCCACCATGAGAGACTCTTCAACAACT
SGN1(CDS)_R_SmaI	TAGCCCCGGGCGATCTTAACGAACCCGGAGC
BIK1(for pUC)_F_BamHI	CGGGATCCATGGGTTCTTGCTTCAGTTCTCG
BIK1(for pUC)_R_StuI	GAAGGCCTCACAAGGTGCCTGCCAAAAG
BIK1(K105E, for pUC)_F	TTGGTCATCGCCGTTGAAAAGCTTAACCAAG
BIK1(K105E, for pUC)_R	CTTGGTTAAGCTTTTCAACGGCGATGACCAA
BIK1(for pGEX-6P-1)_F_BamHI	GCTAGGATCCGGCAGCTGTTTTAGTAGCC
BIK1(for pGEX-6P-1)_R_SalI	TAGCGTCGACTTACACCAGATGACGGCCAAACG
BIK1(K105E, for pGEX-6P-1)-F	CTGGTTATTGCCGTTGAAAAACTGAATCAGG
BIK1(K105E, for pGEX-6P-1)-R	CCTGATTCAGTTTTTCAACGGCAATAACCAG
BIK1(S89A/T90A)-F	GGTTGGCTGGATGAA GCCGCC CTGACTCCGACCAAA
BIK1(S89A/T90A)-R	TTTGGTCGGAGTCAG GGCGGC TTCATCCAGCCAACC
BIK1(Y150F)-F	CATCGCCTGCTGGTT TTT GAATTTATGCAGAAA
BIK1(Y150F)-R	TTTCTGCATAAATTC AAA AACCAGCAGGCGATG
BIK1(S236A)-F	GATCTGAGCTATGTT GCC ACACGTGTGATGGGT
BIK1(S236A)-R	ACCCATCACACGTGT GGC AACATAGCTCAGATC
BIK1(T237A)-F	CTGAGCTATGTTTCT GCC CGTGTGATGGGTACC
BIK1(T237A)-R	GGTACCCATCACACG GGC AGAAACATAGCTCAG
BIK1(S236A/T237A)-F	GATCTGAGCTATGTT GCCGCC CGTGTGATGGGTACC
BIK1(S236A/T237A)-R	GGTACCCATCACACG GGCGGC AACATAGCTCAGATC
BIK1(T242A)-F	ACACGTGTGATGGGT GCC TATGGCTATGCAGCC
BIK1(T242A)-R	GGCTGCATAGCCATA GGC ACCCATCACACGTGT
BIK1(Y243F)-F	CGTGTGATGGGTACC TTT GGCTATGCAGCCCCG
BIK1(Y243F)-R	CGGGGCTGCATAGCC AAA GGTACCCATCACACG
BIK1(Y250F)-F	TATGCAGCCCCGGAA TTT ATGAGCAGTGGTCAT
BIK1(Y250F)-F	ATGACCACTGCTCAT AAA TTCCGGGGCTGCATA
RT-qPCR
SGN3_F	GGACCGGAGTCACATGCGAC
SGN3_R	GGGACCAACTAGATTGTTGGAAGATAG
GSO2_F	CTCTCACAGATCTCTTGTTTCTTG
GSO2_R	GAGTTTGAAGATCGTCTCTTTG
PEPR1_F	CTGATTCAGTTCGGTAATCTCG
PEPR1_R	CATATTTGGGCCTTCAATAAGCC
PEPR2_F	CACGAAACAGTCTCCGAGTAG
PEPR2_R	GAAACGATCGATGAGTTTGGTG
CIF1_F	CGACCATCGATTTTTGTTCAT
CIF1_R	TCTTAGAAGCCTCTCATGCTCA
CIF2_F	GCCAAGAAGATGATCATCCCG
CIF2_R	GGGAATAAGCTTGAAAGGAGGTCTC
CIF3_F	CATTGTGGTTGCTTTCGTGG
CIF3_R	GTGGTGGTGCAAAATCATC
CIF4_F	GGCAAGACCTTCTATCTCTACG
CIF4_R	GTCTCTGTATTGGACCTAGACTG
SGN1_F	ATCCACCAAATCCTCACCGT
SGN1_R	GCCAAAGACGGTTTGGTCAT
BIK1_F	GGCAACTGAGTCACCCAAAT
BIK1_R	GGATCGCTGTGAAGAAAAGC
MYB15_F	CACCAAATACTTGGCAATAGATGG
MYB15_R	GGCTTATGAGTGTCATCGAAGAAA
PAL1_F	GCTTAAGGCAGTGCTACCGA
PAL1_R	ACCTTCACAAATCGCCGTGA
C4H_F	GGAAACGTTTGCAATTGATGATGT
C4H_R	GCAATTCCCCACTCGATAGACCAC
FRK1_F	ATCTTCGCTTGGAGCTTCTC
FRK1_R	TGCAGCGCAAGGACTAGAG
RbohD_F	GGGAATGCTTAGGAATGAATAAGGAATC
RbohD_R	CCATCTTCATCTTTGTCCACCATG
Actin2_F	TCCGCTCTTTCTTTCCAAGCTCA
Actin2_R	CCCTGGGAGCATCATCTCCTG
Genotyping
SGN3_F	GGTTTAGGTCAACCGGGTATC
SGN3_R	TGACATATCTAACAAGGACAGCTC
GSO2_F	GTTGAACCTCGAAGAGAATCAG
GSO2_R	CGGTATCAGTTTGCATCTCC
CIF1_F	CTCTCTAATTTGGCGTCTTG
CIF1_R	GGATGGATTAGAACCAATTCTAATG
CIF2_F	GAGGCCTAATCGTACATTATTCAG
CIF2_R	CATGAAGTTGCAGAGAAAAGC
SGN1_F	CCGTTACGTATTACATTGTGACC
SGN1_R	CCACGTGGCATAAACTCGTAG
BIK1_F	CCGAGACATTAAAGCCTCGAAC
BIK1_R	GCACACAAGGAAGCCTAAGC
FLS2(for SALK_141277)_F	AGGGCTTCTTACAAACCTTCG
FLS2(for SALK_141277)_R	CGTTGATGTTTTTGAACACCC
PEPR1_F	CTAACAATTTCTCCGGGACTATAC
PEPR1_R	CCGAACTGAATCAGAGGAG
PEPR2_F	CTATTCCATCAAGCTTCAGAAGC
PEPR2_R	GTTCAGCAACAAGGACAGAC
FLS2(for SAIL_691C04)_F	GGGTCAAGATGAGGTTGTCC
FLS2(for SAIL_691C04)_R	CCGGTCCAATTACAGTGTCG
EFR_F	CGGGAATCTTGTAAGCCTGC
EFR_R	CAGATGGGTTACCATCACTGGC
CERK1_F	GACTGTTTATGGAGAAGTGTCTGC
CERK1_R	CTACCGGCCGGACATAAGAC
BAK1_dCAPS_F	AAGAGGGCTTGCGTATTTACATGATCAGT
BAK1_dCAPS_R	GAGGCGAGCAAGATCAAAAG
BKK1_F	TGGCTCAGAAGAAAACCACAG
BKK1_R	CTGCTCCACTTCTGTTTCCAC
